# Supplementary material for: A community-driven resource for genomic epidemiology and antimicrobial resistance prediction of Neisseria gonorrhoeae at Pathogenwatch
Source: bioRxiv or medRxiv preprint supplement (doi:10.1101/2020.07.03.186726), 2020-12-04
Supplement: Supplementary file [file media-1.pdf]

Table S1. List of studies included in the antimicrobial resistance (AMR) benchmark analyses. The number of isolates included from each study and the antibiotics for which minimum inhibitory concentration (MIC) information is provided is also indicated.

| Collection                      | Study (Reference)                         | Number of isolates | Project accession                   | Antibiotics                                                                             |
|---------------------------------|-------------------------------------------|--------------------|-------------------------------------|-----------------------------------------------------------------------------------------|
| Test dataset<br>(N=3,987)       | Chisholm <i>et al.</i> 2015 (52)          | 15                 | PRJEB14933                          | Azithromycin, Ceftriaxone                                                               |
|                                 | Golparian <i>et al.</i> 2020 (53)         | 183                | PRJEB4024                           | Azithromycin, Ceftriaxone, Cefixime, Ciprofloxacin, Tetracycline, Benzylpenicillin      |
|                                 | Demczuk <i>et al.</i> 2015, 2016 (54, 55) | 382                | PRJNA298332<br>PRJNA266539          | Azithromycin, Ceftriaxone, Cefixime, Ciprofloxacin, Tetracycline, Benzylpenicillin      |
|                                 | Harris <i>et al.</i> 2018 (16)            | 1,054              | PRJEB9227                           | Azithromycin, Ceftriaxone, Cefixime, Ciprofloxacin                                      |
|                                 | Eyre <i>et al.</i> 2017 (56)              | 249                | PRJNA315363                         | Azithromycin, Cefixime, Ciprofloxacin, Tetracycline, Benzylpenicillin                   |
|                                 | Fifer <i>et al.</i> 2018 (57)             | 101                | PRJEB23008                          | Azithromycin                                                                            |
|                                 | Sánchez-Busó <i>et al.</i> 2019 (58)      | 403                | PRJEB4024                           | Azithromycin, Ceftriaxone, Cefixime, Ciprofloxacin, Tetracycline, Benzylpenicillin      |
|                                 | Grad <i>et al.</i> 2014, 2016 (19, 59)    | 1,114              | PRJEB2090<br>PRJEB2999<br>PRJEB7904 | Azithromycin, Ceftriaxone, Cefixime, Ciprofloxacin, Tetracycline, Benzylpenicillin      |
|                                 | Jacobsson <i>et al.</i> 2016 (60)         | 74                 | PRJNA322768                         | Azithromycin, Ceftriaxone, Cefixime, Ciprofloxacin                                      |
|                                 | Lee <i>et al.</i> 2018 (61)               | 398                | PRJNA394216                         | Azithromycin, Ceftriaxone, Cefixime, Ciprofloxacin, Tetracycline, Benzylpenicillin      |
|                                 | Unemo <i>et al.</i> 2016 (23)             | 14                 | PRJEB4024                           | Azithromycin, Ceftriaxone, Cefixime, Ciprofloxacin, Tetracycline, Benzylpenicillin      |
| Validation dataset<br>(N=1,607) | Town <i>et al.</i> 2020 (62)              | 1,288              | PRJEB19989                          | Azithromycin, Ceftriaxone, Cefixime, Ciprofloxacin, Benzylpenicillin                    |
|                                 | Yahara <i>et al.</i> 2018 (63)            | 245                | PRJDB6496<br>PRJDB6504              | Azithromycin, Ceftriaxone, Cefixime, Ciprofloxacin                                      |
|                                 | Kwong <i>et al.</i> 2018 (64)             | 75                 | PRJEB17738                          | Azithromycin, Ceftriaxone, Ciprofloxacin, Tetracycline, Benzylpenicillin, Spectinomycin |

Table S2. Summary of the benchmark analysis of the list of genetic antimicrobial resistance (AMR) mechanisms. AZM = Azithromycin, CIP = Ciprofloxacin, CFM = Cefixime, CRO = Ceftriaxone, PEN = Benzylpenicillin, TET = Tetracycline, SPT = Spectinomycin, TP = True Positives, FP = False Positives, TN = True Negatives, FN = False Negatives, NPV = Negative Predictive Value, CI = Confidence Intervals.

| Antibiotic | Dataset            | TOTAL | TP   | FP  | TN   | FN  | Sensitivity            | Specificity            | NPV                    | PPV                    |
|------------|--------------------|-------|------|-----|------|-----|------------------------|------------------------|------------------------|------------------------|
| AZM        | Test<br>(CI)       | 3679  | 468  | 17  | 3008 | 186 | 71.56<br>(67.93-74.99) | 99.44<br>(99.10-99.67) | 94.18<br>(93.31-94.96) | 96.49<br>(94.45-97.95) |
|            | Validation<br>(CI) | 1573  | 8    | 7   | 1556 | 2   | 80.00<br>(44.39-97.48) | 99.55<br>(99.08-99.82) | 99.87<br>(99.54-99.98) | 53.33<br>(26.59-78.73) |
| CFM        | Test<br>(CI)       | 3601  | 371  | 323 | 2892 | 15  | 96.11<br>(93.67-97.81) | 89.95<br>(88.86-90.97) | 99.48<br>(99.15-99.71) | 53.46<br>(49.67-57.22) |
|            | Validation<br>(CI) | 1498  | 68   | 137 | 1289 | 4   | 94.44<br>(86.38-98.47) | 90.39<br>(88.74-91.87) | 99.69<br>(99.21-99.92) | 33.17<br>(26.77-40.07) |
| CIP        | Test<br>(CI)       | 3281  | 1548 | 15  | 1671 | 47  | 97.05<br>(96.10-97.83) | 99.11<br>(98.54-99.50) | 97.26<br>(96.38-97.98) | 99.04<br>(98.42-99.46) |
|            | Validation<br>(CI) | 1290  | 549  | 4   | 693  | 44  | 92.58<br>(90.17-94.56) | 99.43<br>(98.54-99.84) | 94.03<br>(92.07-95.63) | 99.28<br>(98.16-99.80) |
| CRO        | Test<br>(CI)       | 3635  | 9    | 5   | 3603 | 18  | 33.33<br>(16.52-53.96) | 99.86<br>(99.68-99.95) | 99.50<br>(99.22-99.71) | 64.29<br>(35.14-87.24) |
|            | Validation<br>(CI) | 1571  | 3    | 0   | 1565 | 3   | 50.00<br>(11.81-88.19) | 100.00<br>(99.76-100)  | 99.81<br>(99.44-99.96) | 100.00<br>(29.24-100)  |
| PEN        | Test<br>(CI)       | 1654  | 1424 | 46  | 157  | 27  | 98.14<br>(97.30-98.77) | 77.34<br>(70.96-82.91) | 85.33<br>(79.37-90.10) | 96.87<br>(95.85-97.70) |
|            | Validation<br>(CI) | 1330  | 1228 | 86  | 7    | 9   | 99.27<br>(98.62-99.67) | 7.53<br>(3.08-14.90)   | 43.75<br>(19.75-70.12) | 93.46<br>(91.98-94.73) |
| TET        | Test<br>(CI)       | 1661  | 1096 | 215 | 341  | 9   | 99.19<br>(98.46-99.63) | 61.33<br>(57.14-65.40) | 97.43<br>(95.17-98.82) | 83.60<br>(81.48-85.57) |
|            | Validation<br>(CI) | 75    | 74   | 0   | 0    | 1   | 98.67<br>(92.79-99.97) | -                      | 0.00<br>(0.00-97.50)   | 100.00<br>(95.14-100)  |
| SPT        | Validation<br>(CI) | 75    | 0    | 0   | 75   | 0   | -                      | 100.00<br>(95.20-100)  | 100.00<br>(95.20-100)  | -                      |

Table S3. List of genetic mechanisms detected on the test dataset (N=3,987) for each of the six main antibiotics. The total number of isolates carrying each mechanism and the benchmark results are shown. AZM = Azithromycin, CIP = Ciprofloxacin, CFM = Cefixime, CRO = Ceftriaxone, PEN = Benzylpenicillin, TET = Tetracycline, SPT = Spectinomycin, TP = True Positives, FP = False Positives, PPV = Positive Predictive Values.

| Agent | Mechanism                                                    | Total | TP   | FP  | PPV   |
|-------|--------------------------------------------------------------|-------|------|-----|-------|
| AZM   | 23S_rDNA_a2045g                                              | 108   | 106  | 2   | 98.15 |
| AZM   | 23S_rDNA_c2597t                                              | 340   | 331  | 9   | 97.35 |
| AZM   | 23S_rDNA_c2597t__mtrR_promoter_a-57del__mtrR_G45D            | 6     | 6    | 0   | 100   |
| AZM   | <i>ermB</i>                                                  | 1     | 1    | 0   | 100   |
| AZM   | <i>ermC</i>                                                  | 2     | 2    | 0   | 100   |
| AZM   | <i>mtr_mosaic_1</i>                                          | 6     | 4    | 2   | 66.67 |
| AZM   | <i>mtr_mosaic_2</i>                                          | 24    | 21   | 3   | 87.5  |
| AZM   | <i>mtr_mosaic_3</i>                                          | 1     | 1    | 0   | 100   |
| AZM   | <i>mtrD_mosaic_1</i>                                         | 8     | 5    | 3   | 62.5  |
| AZM   | <i>mtrD_mosaic_2</i>                                         | 21    | 19   | 2   | 90.48 |
| AZM   | <i>mtrD_mosaic_3</i>                                         | 1     | 1    | 0   | 100   |
| AZM   | <i>rplD_G70D_23S_rDNA_c2597t</i>                             | 5     | 5    | 0   | 100   |
| AZM   | <i>rplV_-----83KGPSLK</i>                                    | 1     | 1    | 0   | 100   |
| AZM   | <i>rplV_----90ARAK</i>                                       | 1     | 1    | 0   | 100   |
| CFM   | <i>penA_A311V_G545S_I312M_T483S_V316P</i>                    | 1     | 1    | 0   | 100   |
| CFM   | <i>penA_A311V_G545S_I312M_T483S_V316T</i>                    | 1     | 1    | 0   | 100   |
| CFM   | <i>penA_A501P</i>                                            | 4     | 4    | 0   | 100   |
| CFM   | <i>penA_G545S_I312M_V316T</i>                                | 690   | 367  | 323 | 53.19 |
| CFM   | <i>penA_G545S_I312M_V316T__mtrR_G45D</i>                     | 50    | 39   | 11  | 78    |
| CFM   | <i>penA_T483S</i>                                            | 2     | 2    | 0   | 100   |
| CFM   | <i>penA_V316P</i>                                            | 1     | 1    | 0   | 100   |
| CFM   | <i>rpoB_R201H</i>                                            | 1     | 1    | 0   | 100   |
| CFM   | <i>rpoB_R201H__mtrR_G45D</i>                                 | 1     | 1    | 0   | 100   |
| CFM   | <i>rpoD_A95-_D92-_D93-_D94-</i>                              | 1     | 1    | 0   | 100   |
| CFM   | <i>rpoD_A95-_D92-_D93-_D94-__mtrR_G45D</i>                   | 1     | 1    | 0   | 100   |
| CFM   | <i>rpoD_E98K</i>                                             | 1     | 1    | 0   | 100   |
| CFM   | <i>rpoD_E98K__mtrR_G45D</i>                                  | 1     | 1    | 0   | 100   |
| CIP   | <i>gyrA_D95A</i>                                             | 227   | 225  | 2   | 99.12 |
| CIP   | <i>gyrA_D95G</i>                                             | 1199  | 1192 | 7   | 99.42 |
| CIP   | <i>gyrA_D95N</i>                                             | 57    | 57   | 0   | 100   |
| CIP   | <i>gyrA_S91F</i>                                             | 1511  | 1503 | 8   | 99.47 |
| CIP   | <i>parC_D86N</i>                                             | 90    | 90   | 0   | 100   |
| CIP   | <i>parC_E91K</i>                                             | 22    | 22   | 0   | 100   |
| CIP   | <i>parC_S87I</i>                                             | 14    | 14   | 0   | 100   |
| CIP   | <i>parC_S87N</i>                                             | 98    | 98   | 0   | 100   |
| CIP   | <i>parC_S87R</i>                                             | 1050  | 1037 | 13  | 98.76 |
| CIP   | <i>parC_S88P</i>                                             | 25    | 25   | 0   | 100   |
| CIP   | <i>parE_G410V</i>                                            | 5     | 5    | 0   | 100   |
| CRO   | <i>penA_A311V_G545S_I312M_T483S_V316P</i>                    | 1     | 1    | 0   | 100   |
| CRO   | <i>penA_A311V_G545S_I312M_T483S_V316T</i>                    | 1     | 1    | 0   | 100   |
| CRO   | <i>penA_A501P</i>                                            | 4     | 4    | 0   | 100   |
| CRO   | <i>penA_A501V_G542S</i>                                      | 5     | 2    | 3   | 40    |
| CRO   | <i>penA_T483S</i>                                            | 2     | 2    | 0   | 100   |
| CRO   | <i>penA_V316P</i>                                            | 1     | 1    | 0   | 100   |
| CRO   | <i>rpoB_R201H</i>                                            | 1     | 1    | 0   | 100   |
| CRO   | <i>rpoD_A95-_D92-_D93-_D94-</i>                              | 1     | 0    | 1   | 0     |
| CRO   | <i>rpoD_E98K</i>                                             | 1     | 0    | 1   | 0     |
| PEN   | <i>blaTEM</i>                                                | 133   | 129  | 4   | 96.99 |
| PEN   | <i>mtrR_A39T__porB1b_A121D_G120K</i>                         | 31    | 31   | 0   | 100   |
| PEN   | <i>mtrR_disrupted</i>                                        | 67    | 65   | 2   | 97.01 |
| PEN   | <i>mtrR_G45D</i>                                             | 231   | 218  | 13  | 94.37 |
| PEN   | <i>mtrR_promoter_a-56c</i>                                   | 1     | 1    | 0   | 100   |
| PEN   | <i>mtrR_promoter_a-57del</i>                                 | 687   | 665  | 22  | 96.8  |
| PEN   | <i>mtrR_promoter_a-57del__penA_G542S__porB1b_A121D_G120K</i> | 42    | 41   | 1   | 97.62 |
| PEN   | <i>mtrR_promoter_a-57del__porB1b_A121N_G120K</i>             | 286   | 276  | 10  | 96.5  |
| PEN   | <i>mtrR_promoter_g-131a</i>                                  | 9     | 9    | 0   | 100   |
| PEN   | <i>penA_A501P</i>                                            | 4     | 4    | 0   | 100   |
| PEN   | <i>penA_A501T</i>                                            | 55    | 55   | 0   | 100   |

|     |                                                                    |      |      |     |       |
|-----|--------------------------------------------------------------------|------|------|-----|-------|
| PEN | <i>penA_A501V</i>                                                  | 30   | 30   | 0   | 100   |
| PEN | <i>penA_G542S</i>                                                  | 120  | 118  | 2   | 98.33 |
| PEN | <i>penA_G545S</i>                                                  | 297  | 289  | 8   | 97.31 |
| PEN | <i>penA_G545S_I312M_V316T__porB1b_A121D_G120K</i>                  | 17   | 17   | 0   | 100   |
| PEN | <i>penA_I312M</i>                                                  | 316  | 306  | 10  | 96.84 |
| PEN | <i>penA_ins346D</i>                                                | 1124 | 1091 | 33  | 97.06 |
| PEN | <i>penA_P551S</i>                                                  | 92   | 87   | 5   | 94.57 |
| PEN | <i>penA_T483S</i>                                                  | 2    | 2    | 0   | 100   |
| PEN | <i>penA_V316P</i>                                                  | 1    | 1    | 0   | 100   |
| PEN | <i>penA_V316T</i>                                                  | 315  | 305  | 10  | 96.83 |
| PEN | <i>ponA1_L421P</i>                                                 | 786  | 764  | 22  | 97.2  |
| PEN | <i>porB1b_A121D</i>                                                | 323  | 314  | 9   | 97.21 |
| PEN | <i>porB1b_A121D__ponA1_L421P__mtrR_G45D__mtrR_promoter_a-57del</i> | 34   | 33   | 1   | 97.06 |
| PEN | <i>porB1b_A121N</i>                                                | 305  | 293  | 12  | 96.07 |
| PEN | <i>porB1b_A121N_G120K__ponA1_L421P__mtrR_promoter_a-57del</i>      | 269  | 259  | 10  | 96.28 |
| PEN | <i>porB1b_G120K</i>                                                | 618  | 597  | 21  | 96.6  |
| TET | <i>mtrR_disrupted</i>                                              | 67   | 62   | 5   | 92.54 |
| TET | <i>mtrR_promoter_a-56c</i>                                         | 1    | 1    | 0   | 100   |
| TET | <i>mtrR_promoter_a-57del</i>                                       | 691  | 651  | 40  | 94.21 |
| TET | <i>mtrR_promoter_a-57del__rpsJ_V57M</i>                            | 681  | 646  | 35  | 94.86 |
| TET | <i>mtrR_promoter_a-57del__rpsJ_V57M__mtrR_G45D</i>                 | 83   | 78   | 5   | 93.98 |
| TET | <i>mtrR_promoter_g-131a</i>                                        | 9    | 7    | 2   | 77.78 |
| TET | <i>rpsJ_V57M</i>                                                   | 1292 | 1083 | 209 | 83.82 |
| TET | <i>rpsJ_V57M__mtrR_A39T__mtrR_promoter_a-57del</i>                 | 6    | 5    | 1   | 83.33 |
| TET | <i>rpsJ_V57M__mtrR_A39T_disrupted</i>                              | 51   | 51   | 0   | 100   |
| TET | <i>rpsJ_V57M__mtrR_A39T_G45D</i>                                   | 3    | 3    | 0   | 100   |
| TET | <i>rpsJ_V57M__mtrR_promoter_a-56c</i>                              | 1    | 1    | 0   | 100   |
| TET | <i>tetM</i>                                                        | 245  | 243  | 2   | 99.18 |

Table S4. List of genetic mechanisms detected on the validation dataset (N=1,607) for each of the six main antibiotics. The total number of isolates carrying each mechanism and the benchmark results are shown. AZM = Azithromycin, CIP = Ciprofloxacin, CFM = Cefixime, CRO = Ceftriaxone, PEN = Benzylpenicillin, TET = Tetracycline, SPT = Spectinomycin, TP = True Positives, FP = False Positives, PPV = Positive Predictive Values.

| Agent | Mechanism                                                                                      | Total | TP   | FP  | PPV   |
|-------|------------------------------------------------------------------------------------------------|-------|------|-----|-------|
| AZM   | 23S_rDNA_a2045g                                                                                | 3     | 3    | 0   | 100   |
| AZM   | 23S_rDNA_c2597t                                                                                | 3     | 3    | 0   | 100   |
| AZM   | <i>mtr</i> _mosaic_1                                                                           | 2     | 1    | 1   | 50    |
| AZM   | <i>mtr</i> _mosaic_2                                                                           | 8     | 2    | 6   | 25    |
| AZM   | <i>mtrD</i> _mosaic_1                                                                          | 1     | 1    | 0   | 100   |
| AZM   | <i>mtrD</i> _mosaic_2                                                                          | 6     | 2    | 4   | 33.33 |
| CFM   | <i>penA</i> _A311V_G545S_I312M_T483S_V316T                                                     | 3     | 3    | 0   | 100   |
| CFM   | <i>penA</i> _G545S_I312M_V316T                                                                 | 205   | 68   | 137 | 33.17 |
| CFM   | <i>penA</i> _G545S_I312M_V316T__ <i>mtrR</i> _G45D                                             | 32    | 21   | 11  | 65.63 |
| CFM   | <i>penA</i> _T483S                                                                             | 3     | 3    | 0   | 100   |
| CIP   | <i>gyrA</i> _D95A                                                                              | 188   | 185  | 3   | 98.4  |
| CIP   | <i>gyrA</i> _D95G                                                                              | 309   | 308  | 1   | 99.68 |
| CIP   | <i>gyrA</i> _D95N                                                                              | 55    | 55   | 0   | 100   |
| CIP   | <i>gyrA</i> _S91F                                                                              | 549   | 545  | 4   | 99.27 |
| CIP   | <i>parC</i> _D86N                                                                              | 90    | 90   | 0   | 100   |
| CIP   | <i>parC</i> _E91K                                                                              | 4     | 4    | 0   | 100   |
| CIP   | <i>parC</i> _S87I                                                                              | 6     | 6    | 0   | 100   |
| CIP   | <i>parC</i> _S87N                                                                              | 31    | 30   | 1   | 96.77 |
| CIP   | <i>parC</i> _S87R                                                                              | 321   | 320  | 1   | 99.69 |
| CIP   | <i>parC</i> _S88P                                                                              | 44    | 44   | 0   | 100   |
| CRO   | <i>penA</i> _A311V_G545S_I312M_T483S_V316T                                                     | 3     | 3    | 0   | 100   |
| CRO   | <i>penA</i> _T483S                                                                             | 3     | 3    | 0   | 100   |
| PEN   | <i>bla</i> TEM                                                                                 | 561   | 525  | 36  | 93.58 |
| PEN   | <i>mtrR</i> _A39T__ <i>porB1b</i> _A121D_G120K                                                 | 11    | 11   | 0   | 100   |
| PEN   | <i>mtrR</i> _disrupted                                                                         | 94    | 91   | 3   | 96.81 |
| PEN   | <i>mtrR</i> _G45D                                                                              | 144   | 141  | 3   | 97.92 |
| PEN   | <i>mtrR</i> _promoter_a-56c                                                                    | 2     | 2    | 0   | 100   |
| PEN   | <i>mtrR</i> _promoter_a-57del                                                                  | 395   | 388  | 7   | 98.23 |
| PEN   | <i>mtrR</i> _promoter_a-57del__ <i>penA</i> _G542S__ <i>porB1b</i> _A121D_G120K                | 2     | 2    | 0   | 100   |
| PEN   | <i>mtrR</i> _promoter_a-57del__ <i>porB1b</i> _A121N_G120K                                     | 60    | 60   | 0   | 100   |
| PEN   | <i>mtrR</i> _promoter_g-131a                                                                   | 3     | 3    | 0   | 100   |
| PEN   | <i>penA</i> _A501T                                                                             | 98    | 98   | 0   | 100   |
| PEN   | <i>penA</i> _A501V                                                                             | 30    | 30   | 0   | 100   |
| PEN   | <i>penA</i> _G542S                                                                             | 31    | 31   | 0   | 100   |
| PEN   | <i>penA</i> _G545S                                                                             | 93    | 93   | 0   | 100   |
| PEN   | <i>penA</i> _G545S_I312M_V316T__ <i>porB1b</i> _A121D_G120K                                    | 2     | 2    | 0   | 100   |
| PEN   | <i>penA</i> _I312M                                                                             | 94    | 94   | 0   | 100   |
| PEN   | <i>penA</i> _ins346D                                                                           | 1208  | 1125 | 83  | 93.13 |
| PEN   | <i>penA</i> _P551S                                                                             | 42    | 42   | 0   | 100   |
| PEN   | <i>penA</i> _V316T                                                                             | 94    | 94   | 0   | 100   |
| PEN   | <i>ponA1</i> _L421P                                                                            | 464   | 455  | 9   | 98.06 |
| PEN   | <i>porB1b</i> _A121D                                                                           | 192   | 189  | 3   | 98.44 |
| PEN   | <i>porB1b</i> _A121D__ <i>ponA1</i> _L421P__ <i>mtrR</i> _G45D__ <i>mtrR</i> _promoter_a-57del | 11    | 10   | 1   | 90.91 |
| PEN   | <i>porB1b</i> _A121N                                                                           | 83    | 83   | 0   | 100   |
| PEN   | <i>porB1b</i> _A121N_G120K__ <i>ponA1</i> _L421P__ <i>mtrR</i> _promoter_a-57del               | 60    | 60   | 0   | 100   |
| PEN   | <i>porB1b</i> _G120K                                                                           | 283   | 281  | 2   | 99.29 |
| TET   | <i>mtrR</i> _disrupted                                                                         | 2     | 2    | 0   | 100   |
| TET   | <i>mtrR</i> _promoter_a-57del                                                                  | 37    | 37   | 0   | 100   |
| TET   | <i>mtrR</i> _promoter_a-57del__ <i>rpsJ</i> _V57M                                              | 37    | 37   | 0   | 100   |
| TET   | <i>mtrR</i> _promoter_a-57del__ <i>rpsJ</i> _V57M__ <i>mtrR</i> _G45D                          | 3     | 3    | 0   | 100   |
| TET   | <i>mtrR</i> _promoter_g-131a                                                                   | 3     | 3    | 0   | 100   |
| TET   | <i>rpsJ</i> _V57M                                                                              | 74    | 74   | 0   | 100   |
| TET   | <i>rpsJ</i> _V57M__ <i>mtrR</i> _A39T_disrupted                                                | 2     | 2    | 0   | 100   |
| TET   | <i>tetM</i>                                                                                    | 5     | 5    | 0   | 100   |

Table S5. Point mutations and genes associated with antimicrobial resistance (AMR) detected by Pathogenwatch on the WHO 2016 reference genome panel. Note that screening for a *porA* mutant gene is included.

| Genome Name | Point mutations (SNPs and indels)                                                                                                                                                      | Genes                             |
|-------------|----------------------------------------------------------------------------------------------------------------------------------------------------------------------------------------|-----------------------------------|
| WHO_F       | -                                                                                                                                                                                      | -                                 |
| WHO_G       | <i>folP_R228S,gyrA_S91F,mtrR_promoter_a-57del,parE_G410V,penA_ins346D,ponA1_L421P,rpsJ_V57M</i>                                                                                        | <i>tetM</i>                       |
| WHO_K       | <i>folP_R228S,gyrA_D95N,gyrA_S91F,mtrR_G45D,mtrR_promoter_a-57del,parC_S87R,parC_S88P,penA_G545S,penA_I312M,penA_V316T,ponA1_L421P,porB1b_A121D,porB1b_G120K,rpsJ_V57M</i>             | -                                 |
| WHO_L       | <i>gyrA_D95N,gyrA_S91F,mtrR_G45D,mtrR_promoter_g-131a,parC_D86N,parC_S88P,penA_A501V,penA_G542S,penA_ins346D,ponA1_L421P,porB1b_A121D,porB1b_G120K,rpsJ_V57M</i>                       | -                                 |
| WHO_M       | <i>folP_R228S,gyrA_D95G,gyrA_S91F,mtrR_G45D,mtrR_promoter_a-57del,penA_ins346D,ponA1_L421P,porB1b_A121D,porB1b_G120K,rpsJ_V57M</i>                                                     | <i>blaTEM</i>                     |
| WHO_N       | <i>folP_R228S,gyrA_D95G,gyrA_S91F,mtrR_A39T,mtrR_disrupted,parC_S87I,parE_G410V,penA_ins346D,ponA1_L421P,rpsJ_V57M</i>                                                                 | <i>blaTEM,tetM</i>                |
| WHO_O       | <i>16S_rDNA_c1184t,folP_R228S,mtrR_promoter_a-57del,penA_ins346D,penA_P551S,ponA1_L421P,porB1b_A121D,porB1b_G120K,rpsJ_V57M</i>                                                        | <i>blaTEM</i>                     |
| WHO_P       | <i>folP_R228S,mtrR_disrupted,penA_ins346D,porB1b_A121D,rpsJ_V57M</i>                                                                                                                   | <i>mtr_mosaic_1,mtrD_mosaic_1</i> |
| WHO_U       | <i>23S_rDNA_c2597t,folP_R228S,penA_ins346D,ponA1_L421P,rpsJ_V57M</i>                                                                                                                   | <i>porA</i>                       |
| WHO_V       | <i>23S_rDNA_a2045g,folP_R228S,gyrA_D95G,gyrA_S91F,mtrR_promoter_a-57del,parC_S87R,penA_G542S,penA_ins346D,ponA1_L421P,porB1b_A121D,porB1b_G120K,rpsJ_V57M</i>                          | <i>blaTEM</i>                     |
| WHO_W       | <i>folP_R228S,gyrA_D95N,gyrA_S91F,mtrR_G45D,mtrR_promoter_a-57del,parC_S87R,parC_S88P,penA_G545S,penA_I312M,penA_V316T,ponA1_L421P,porB1b_A121D,porB1b_G120K,rpsJ_V57M</i>             | -                                 |
| WHO_X       | <i>folP_R228S,gyrA_D95N,gyrA_S91F,mtrR_promoter_a-57del,parC_S87R,parC_S88P,penA_A311V,penA_G545S,penA_I312M,penA_T483S,penA_V316P,ponA1_L421P,porB1b_A121D,porB1b_G120K,rpsJ_V57M</i> | -                                 |
| WHO_Y       | <i>folP_R228S,gyrA_D95G,gyrA_S91F,mtrR_promoter_a-57del,parC_S87R,penA_A501P,penA_G545S,penA_I312M,penA_V316T,ponA1_L421P,porB1b_A121N,porB1b_G120K,rpsJ_V57M</i>                      | -                                 |
| WHO_Z       | <i>folP_R228S,gyrA_D95N,gyrA_S91F,mtrR_promoter_a-56c,parC_S87R,parC_S88P,penA_A311V,penA_G545S,penA_I312M,penA_T483S,penA_V316T,ponA1_L421P,porB1b_A121D,porB1b_G120K,rpsJ_V57M</i>   | -                                 |

Table S6. Published studies on *N. gonorrhoeae* genomics for which new public collections have been created in Pathogenwatch sorted by included number of isolates. Dates correspond to those in the final collections.

| PubMed ID (reference)         | ENA project accession(s)            | Collection label (reference)  | Number of isolates in publication | Number of isolates in collection | Geographical location and timescale     |
|-------------------------------|-------------------------------------|-------------------------------|-----------------------------------|----------------------------------|-----------------------------------------|
| 31488838                      | PRJNA520805                         | Williamson et al, 2019 (112)  | 2,186                             | 2,179                            | Australia 2017                          |
| 27427203                      | PRJNA315363                         | De Silva et al, 2016 (113)    | 1,872                             | 1,783                            | Brighton, United Kingdom (UK) 2004-2015 |
| 31978353, 32091356            | PRJEB19989                          | Town et al, 2020* (62, 110)   | 1,277                             | 1,288                            | England, UK 2013-2016                   |
| 27638945                      | PRJEB2090<br>PRJEB2999<br>PRJEB7904 | Grad et al, 2016* (19)        | 1,102                             | 1,035                            | United States (US) 2000-2013            |
| 2020.04.30.20086413 (medRxiv) | PRJEB10016                          | Mortimer et al, 2020 (114)    | 897                               | 891                              | New York City, US 2011-2015             |
| 32213251                      | PRJEB32435                          | Alfsnes et al, 2020 (115)     | 958                               | 816                              | Norway 2016-2017                        |
| 30788502                      | PRJNA317462<br>PRJNA329501          | Thomas et al, 2019 (116)      | 649                               | 644                              | United States 2014-2016                 |
| 31358980                      | PRJEB4024                           | Sánchez-Busó et al, 2019 (58) | 419                               | 395                              | Worldwide 1979-2013                     |
| 29182725                      | PRJNA394216                         | Lee et al, 2018 (61)          | 398                               | 376                              | New Zealand 2014-2015                   |
| 32071056                      | PRJNA317462<br>PRJNA329501          | Schmerer et al, 2020 (117)    | 334                               | 324                              | United States 2016                      |
| 30063202                      | PRJDB6496<br>PRJDB6504              | Yahara et al, 2018 (63)       | 271                               | 245                              | Kyoto and Osaka, Japan 2011-2015        |
| 32068837                      | PRJEB34425                          | Lan et al, 2020 (118)         | 229                               | 227                              | Vietnam 2011-2016                       |
| 24462211                      | PRJEB2090<br>PRJEB2999<br>PRJEB7904 | Grad et al, 2014* (59)        | 236                               | 216                              | United States 2009-2010                 |
| 26935729                      | PRJNA298332                         | Demczuk et al, 2016 (55)      | 246                               | 200                              | Canada 1997-2014                        |
| 27353752                      | PRJEB2124                           | Didelot et al, 2016 (119)     | 237                               | 194                              | Sheffield and London, UK 1995-2004      |
| 32013864                      | PRJEB4024                           | Golparian et al, 2020 (53)    | 231                               | 192                              | Denmark 1928-2013                       |
| 25378573                      | PRJNA266539                         | Demczuk et al, 2015 (54)      | 180                               | 168                              | Canada 1989-2013                        |
| 2020.02.07.935825 (bioRxiv)   | PRJEB32435                          | Osnes et al, 2020 (120)       | 148                               | 133                              | Norway 2015-2018                        |
| 29701830                      | PRJEB10104                          | Cehovin et al, 2018* (121)    | 103                               | 112                              | Coastal Kenya 2010-2015                 |
| 29523496                      | PRJEB23008                          | Fifer et al, 2018 (57)        | 101                               | 100                              | England, UK 2004-2017                   |
| 29367612                      | PRJNA392203                         | Buckley et al, 2018 (122)     | 94                                | 92                               | Australia 2012-2014                     |

|          |             |                                                    |    |    |                                        |
|----------|-------------|----------------------------------------------------|----|----|----------------------------------------|
| 29247013 | PRJEB17738  | Kwong et al, 2018 (64)                             | 94 | 75 | Australia<br>2006-2014                 |
| 28348871 | PRJEB14168  | Kwong et al, 2016 (48);<br>Martin et al, 2004 (44) | 50 | 48 | Australia and New Zealand<br>2004-2015 |
| 29882175 | PRJNA473385 | Ryan et al, 2018 (123)                             | 43 | 42 | Ireland<br>2012-2016                   |
| 28510723 | PRJNA348107 | Wind et al, 2017 (124)                             | 31 | 23 | Amsterdam, Netherlands<br>2002-2012    |
| 25780762 | **          | Ezewudo et al, 2015 (125)                          | 61 | 18 | Worldwide<br>1982-2008                 |
| 26601852 | PRJEB14933  | Chisholm et al, 2015 (52)                          | 15 | 14 | Leeds, UK<br>2015                      |

\* In these collections, the number of accession numbers on the corresponding ENA project was higher than the number in the final publication. These genomes were included in the corresponding collections.

\*\* Multiple ENA project accessions are linked to Ezewudo *et al*, 2015: PRJNA209340, PRJNA209307, PRJNA209319, PRJNA209352, PRJNA209376, PRJNA209466, PRJNA209373, PRJNA209465, PRJNA209320, PRJNA209333, PRJNA209345, PRJNA209351, PRJNA209342, PRJNA209343, PRJNA209347, PRJNA209470, PRJNA244850, PRJNA209316

Table S7. Number of public *N. gonorrhoeae* genomes in Pathogenwatch clustered by country.

| Country        | Number of isolates | Individual proportion (%) | Cumulative sum | Cumulative proportion (%) |
|----------------|--------------------|---------------------------|----------------|---------------------------|
| United Kingdom | 3476               | 27.77                     | 3476           | 27.77                     |
| United States  | 2774               | 22.17                     | 6250           | 49.94                     |
| Australia      | 2388               | 19.08                     | 8638           | 69.02                     |
| Norway         | 990                | 7.91                      | 9628           | 76.93                     |
| New Zealand    | 396                | 3.16                      | 10024          | 80.10                     |
| Canada         | 382                | 3.05                      | 10406          | 83.15                     |
| Japan          | 268                | 2.14                      | 10674          | 85.29                     |
| Denmark        | 255                | 2.04                      | 10929          | 87.33                     |
| Vietnam        | 233                | 1.86                      | 11162          | 89.19                     |
| Spain          | 129                | 1.03                      | 11291          | 90.22                     |
| Kenya          | 112                | 0.89                      | 11403          | 91.11                     |
| Portugal       | 108                | 0.86                      | 11511          | 91.98                     |
| Netherlands    | 92                 | 0.74                      | 11603          | 92.71                     |
| Slovenia       | 77                 | 0.62                      | 11680          | 93.33                     |
| France         | 62                 | 0.50                      | 11742          | 93.82                     |
| Belgium        | 55                 | 0.44                      | 11797          | 94.26                     |
| Austria        | 54                 | 0.43                      | 11851          | 94.69                     |
| Greece         | 54                 | 0.43                      | 11905          | 95.13                     |
| Germany        | 53                 | 0.42                      | 11958          | 95.55                     |
| Sweden         | 51                 | 0.41                      | 12009          | 95.96                     |
| Hungary        | 48                 | 0.38                      | 12057          | 96.34                     |
| Ireland        | 42                 | 0.34                      | 12099          | 96.68                     |
| Slovakia       | 39                 | 0.31                      | 12138          | 96.99                     |
| Latvia         | 38                 | 0.30                      | 12176          | 97.29                     |
| Poland         | 34                 | 0.27                      | 12210          | 97.56                     |
| Scotland       | 30                 | 0.24                      | 12240          | 97.80                     |
| Italy          | 28                 | 0.22                      | 12268          | 98.03                     |
| Belarus        | 24                 | 0.19                      | 12292          | 98.22                     |
| India          | 24                 | 0.19                      | 12316          | 98.41                     |
| Guinea-Bissau  | 22                 | 0.18                      | 12338          | 98.59                     |
| Thailand       | 22                 | 0.18                      | 12360          | 98.76                     |
| Malta          | 20                 | 0.16                      | 12380          | 98.92                     |
| Estonia        | 17                 | 0.14                      | 12397          | 99.06                     |
| Pakistan       | 14                 | 0.11                      | 12411          | 99.17                     |
| Philippines    | 14                 | 0.11                      | 12425          | 99.28                     |
| Russia         | 13                 | 0.10                      | 12438          | 99.38                     |
| Cyprus         | 8                  | 0.06                      | 12446          | 99.45                     |
| Bhutan         | 7                  | 0.06                      | 12453          | 99.50                     |
| China          | 6                  | 0.05                      | 12459          | 99.55                     |
| Gambia         | 5                  | 0.04                      | 12464          | 99.59                     |
| Iceland        | 5                  | 0.04                      | 12469          | 99.63                     |
| Indonesia      | 5                  | 0.04                      | 12474          | 99.67                     |
| Cuba           | 4                  | 0.03                      | 12478          | 99.70                     |
| Turkey         | 4                  | 0.03                      | 12482          | 99.74                     |
| Morocco        | 3                  | 0.02                      | 12485          | 99.76                     |
| South Africa   | 3                  | 0.02                      | 12488          | 99.78                     |
| Brasil         | 2                  | 0.02                      | 12490          | 99.80                     |
| Cabo Verde     | 2                  | 0.02                      | 12492          | 99.82                     |
| Chile          | 2                  | 0.02                      | 12494          | 99.83                     |
| Ivory Coast    | 2                  | 0.02                      | 12496          | 99.85                     |
| Suriname       | 2                  | 0.02                      | 12498          | 99.86                     |
| Tanzania       | 2                  | 0.02                      | 12500          | 99.88                     |
| Angola         | 1                  | 0.01                      | 12501          | 99.89                     |
| Argentina      | 1                  | 0.01                      | 12502          | 99.90                     |
| Armenia        | 1                  | 0.01                      | 12503          | 99.90                     |
| Bulgaria       | 1                  | 0.01                      | 12504          | 99.91                     |
| Caribbean      | 1                  | 0.01                      | 12505          | 99.92                     |

|              |   |      |       |        |
|--------------|---|------|-------|--------|
| Ecuador      | 1 | 0.01 | 12506 | 99.93  |
| Finland      | 1 | 0.01 | 12507 | 99.94  |
| Guinea       | 1 | 0.01 | 12508 | 99.94  |
| Hong Kong    | 1 | 0.01 | 12509 | 99.95  |
| Jamaica      | 1 | 0.01 | 12510 | 99.96  |
| Lithuania    | 1 | 0.01 | 12511 | 99.97  |
| Malaysia     | 1 | 0.01 | 12512 | 99.98  |
| Romania      | 1 | 0.01 | 12513 | 99.98  |
| Saudi Arabia | 1 | 0.01 | 12514 | 99.99  |
| Uganda       | 1 | 0.01 | 12515 | 100.00 |

---
